# Supplementary material for: Maf1‐dependent transcriptional regulation of tRNAs prevents genomic instability and is associated with extended lifespan
Source: PubMed Central journal article supplement (PMC6996946; doi:10.1111/acel.13068), 2019-12-12
Supplement: ACEL-19-e13068-s001.pdf [file ACEL-19-e13068-s001.pdf]

## Supplemental Materials and Methods

### *S. pombe* strains and plasmids

*maf1* $\Delta$  (*maf1::hphMX6*, *maf1::kanMX6*), *pph3* $\Delta$  (*pph3::kanMX6*), and *psk1* $\Delta$  (*psk1::kanMX6*) were generated by PCR-based integration methods to replace each open reading frame with the *kanMX6* or *hphMX6* gene. *maf1-3FLAG* (*maf1-3FLAG::kanMX6*), and *maf1-GFP* (*maf1-GFP::hphMX6*) were also generated by PCR-based integration methods (Bahler *et al.* 1998; Krawchuk & Wahls 1999; Noguchi *et al.* 2008), to construct a FLAG or GFP tag at the C-terminus of each gene. Mutations and epitope-tagged genes have been previously described for *rad52* $\Delta$  (*rad52::hphMX6*), *swi1* $\Delta$  (*swi1::kanMX6*), *rad52-12Pk* (*rad52-12Pk::kanMX6*) (Noguchi *et al.* 2003; Gadaleta *et al.* 2016) and *sfc3-1* (Iwasaki *et al.* 2010). *ppa1* $\Delta$  (*ppa1::ura4<sup>+</sup>*, FY9908), *ppa2* $\Delta$  (*ppa2::ura4<sup>+</sup>*, FY9910), and *torc1* (*tor2<sup>ts</sup>[L2048S]:kan<sup>r</sup>*, FY21019) were obtained from National BioResource Project Japan.

To detect Rad52-YFP DNA repair foci, pJK210-rad52CT-YFP (Rapp *et al.* 2010) was digested by *Afl*III and inserted at the *rad52* locus of various *S. pombe* strains. pJK148-rad52CT-YFP, which also has the *rad52CT-YFP* gene (1.5-kb 3'-coding region of the *rad52* gene fused to YFP cDNA) in pJK148 (Keeney & Boeke 1994), was also constructed and used to detect Rad52-YFP foci. To construct pJK148-*maf1-3FLAG*, the 1.7 kb genomic fragment containing the *maf1-3FLAG* gene was amplified from genomic DNA preparation from *S. pombe maf1-3FLAG* cells and inserted into *Eco*R1/*Bam*HI site of pJK148. *maf1* mutants were generated by Kunkel site-directed mutagenesis in pJK148-*maf1-3FLAG* and integrated at the *leu1* locus of a *maf1::kanMX6* strain.

### Protein extract preparation and antibodies for immunoblotting

Exponentially growing *S. pombe* cells were washed in Stop Buffer (150 mM NaCl, 50 mM NaF, 10 mM EDTA, 1 mM NaN<sub>3</sub>, 1 mM Na<sub>3</sub>VO<sub>4</sub>, 5 mM N-ethylmaleimide), resuspended in 100  $\mu$ L Stop Buffer, boiled for 5 minutes, and chilled on ice. To lyse cells, 120  $\mu$ L 2  $\times$  SDS-PAGE-8 M

Urea sample buffer (150 mM Tris-HCL, pH 6.8, 6% SDS, 6 mM EDTA, 30% glycerol, 8 M urea, 1 mM Na<sub>3</sub>VO<sub>4</sub>, 5 mM N-ethylmaleimide, 1 mM microcystin, 0.1 mM okadaic acid) and 0.5-mm glass beads (Biospec Product) were added to the sample and processed by a FastPrep cell disruptor (Qbiogene, Irvine, CA) for 20 seconds twice at speed 6 at 4°C. Cell lysates were recovered in a microfuge tube and clarified by centrifugation at 13,000 rpm for 10 min at 4°C. Protein concentration was determined using BCA protein Assay Reagent (Thermo Fisher Scientific, Waltham, MA). Protein extracts were boiled for 5 min in the presence of 5% beta-mercaptoethanol, and the protein concentrations were equalized.

For immunoblotting, FLAG fusion proteins were probed with the anti-FLAG M2 monoclonal antibody (Sigma-Aldrich); and TAT1 [gift from Dr. Keith Gull (Woods *et al.* 1989)] to detect tubulin.

### **Immunoprecipitation and phosphatase treatment of the MAF1-5FLAG protein**

Cells expressing Maf1-5FLAG were cultured in YES medium supplemented with 3% glucose, collected, and suspended in lysis buffer A (50 mM Tris-HCl pH8.0, 150 mM NaCl, 0.1% NP-40, 10% glycerol, 5 mM EDTA, and 5 mM *N*-methylmaleimide) supplemented with phosphatase inhibitors (50 mM NaF, 1 mM Na<sub>3</sub>VO<sub>4</sub>, 1 μM microcystin, 0.1 μM okadaic acid), 0.2 mM *p*-4-amidoinophenyl-methane sulfonyl fluoride hydrochloride monohydrate, and Halt protease inhibitor cocktail (Thermo Fisher Scientific). Cells were they lysed with glass beads using a FastPrep cell disruptor as described above. Protein extracts were then clarified by centrifugation at 13,000 rpm for 10 min at 4°C, mixed with anti-FLAG MS agarose (Sigma-Aldrich), incubated for 2 hours at 4°C. The agarose beads were collected, washed three times in lysis buffer A without phosphatase inhibitors. Maf1-5FLAG on agarose beads was treated with 200 units of λ phosphatase (New England Biolabs) with or without phosphatase inhibitors (50 mM NaF, 10 mM Na<sub>3</sub>VO<sub>4</sub>, 1 μM okadaic acid, 4 μM microcystin) and processed for Western blotting using anti-FLAG polyclonal antibody (F7425, Sigma-Aldrich).

## **Fluorescence microscopy**

Detection of Rad52-YFP has been described previously (Noguchi *et al.* 2009; Gadaleta *et al.* 2016). Cells are grown to mid-log phase at 25°C. The quantification of Rad52-YFP protein was performed at least three times, and at least 200 cells were counted for each experiment.

## **SUPPLEMENTARY FIGURE LEGENDS**

### **Supplementary Figure S1:**

(A) WT cells were cultured overnight at 30°C in YES liquid medium containing different percentages of glucose (0.1, 0.5, 1, 3, and 5%). Exponentially growing cells were diluted to OD<sub>600</sub> of 0.5 at the starting point (0 hr) and incubated at 30°C. OD<sub>600</sub> was determined at the indicated times.

(B) WT and *maf1*Δ cells were grown at 30°C in YES liquid medium containing different percentages of glucose, OD<sub>600</sub> and was monitored at the indicated times.

(C) *maf1*Δ cells transformed with the control vector or Maf1-expressing vector were evaluated in the lifespan assay described in Figure 1C. Representative images of repeat experiments are shown.

### **Supplementary Figure S2:**

The cells of the indicated genotypes were first cultured at 30°C in YES liquid medium with different percentages of glucose (0.1, 1 and 5%) for the indicated days. Five-fold serial dilutions of the cells were then plated on YES agar medium containing 3% glucose, incubated for 3 days at 30°C, and photographed.

### **Supplementary Figure S3:**

(A) Immunoprecipitated Maf1-FLAG was incubated with or without λ phosphatase and detected by Western blotting. The panel also shows Maf1-FLAG treated with λ phosphatase in the presence of phosphatase inhibitors.

**(B, C, D)** Cells of the indicated genotypes were engineered to express Maf1-5FLAG and grown at 30°C in YES liquid medium supplemented with indicated percentages glucose. Protein extracts were prepared, and Western blotting of Maf1-5FLAG was performed. Tubulin was used as a loading control. Representative images of repeat experiments are shown.

**Supplementary Figure S4:**

**(A)** Schematic drawing of Maf1 homologs from *S. cerevisiae*, humans and *S. pombe*. Yellow boxes indicate the regions of amino acid sequences that are highly conserved among species. Potential phosphorylation sites are also indicated.

**(B)** ClustalW multiple sequence alignment of Maf1 proteins from humans, *S. cerevisiae*, and *S. pombe*.

**Supplementary Figure S5:**

**(A)** The *sfc3-1* mutation rescues the short lifespan of *maf1Δ* cells.

**(B)** *psk1Δ* cells failed to show a lifespan shortening phenotype.

In *A* and *B*, cells of the indicated genotypes were first grown at 30°C for the indicated days in YES liquid medium supplemented with 0.1%, 1% or 5% glucose. To evaluate cell viability, five-fold serial dilutions of the cells were prepared and plated on YES agar medium supplemented with 3% glucose. The agar plates were photographed after 3 days of incubation at 30°C.

**Supplementary Figure S6:**

Rad52-YFP foci formation in normal glucose medium. WT and *maf1Δ* cells expressing Rad52-YFP were grown to mid-log phase in YES liquid medium with 3 % glucose at 25°C for the indicated days. The cells were then subjected to fluorescence microscopy. Quantification of Rad52-YFP was performed as described in Figure 7A legend. There was no significant difference between WT and *maf1Δ* cells in Rad52-YFP formation.

**Supplementary Table S1:** *S. pombe* strains used in this study.

**Supplementary Table S2:** Oligonucleotide primers used in this study.

### Supplementary References

- Bahler J, Wu JQ, Longtine MS, Shah NG, McKenzie A, 3rd, Steever AB, Wach A, Philippsen P, Pringle JR (1998). Heterologous modules for efficient and versatile PCR-based gene targeting in *Schizosaccharomyces pombe*. *Yeast*. **14**, 943-951.
- Gadaleta MC, Das MM, Tanizawa H, Chang YT, Noma K, Nakamura TM, Noguchi E (2016). Swi1Timeless Prevents Repeat Instability at Fission Yeast Telomeres. *PLoS Genet*. **12**, e1005943.
- Iwasaki O, Tanaka A, Tanizawa H, Grewal SI, Noma K (2010). Centromeric localization of dispersed Pol III genes in fission yeast. *Molecular biology of the cell*. **21**, 254-265.
- Keeney JB, Boeke JD (1994). Efficient targeted integration at *leu1-32* and *ura4-294* in *Schizosaccharomyces pombe*. *Genetics*. **136**, 849-856.
- Krawchuk MD, Wahls WP (1999). High-efficiency gene targeting in *Schizosaccharomyces pombe* using a modular, PCR-based approach with long tracts of flanking homology. *Yeast*. **15**, 1419-1427.
- Noguchi C, Garabedian MV, Malik M, Noguchi E (2008). A vector system for genomic FLAG epitope-tagging in *Schizosaccharomyces pombe*. *Biotechnol J*. **3**, 1280-1285.
- Noguchi E, Ansbach AB, Noguchi C, Russell P (2009). Assays used to study the DNA replication checkpoint in fission yeast. *Methods Mol Biol*. **521**, 493-507.
- Noguchi E, Noguchi C, Du LL, Russell P (2003). Swi1 prevents replication fork collapse and controls checkpoint kinase Cds1. *Mol Cell Biol*. **23**, 7861-7874.
- Rapp JB, Noguchi C, Das MM, Wong LK, Ansbach AB, Holmes AM, Arcangioli B, Noguchi E (2010). Checkpoint-dependent and -independent roles of Swi3 in replication fork recovery and sister chromatid cohesion in fission yeast. *PLoS One*. **5**, e13379.
- Woods A, Sherwin T, Sasse R, MacRae TH, Baines AJ, Gull K (1989). Definition of individual components within the cytoskeleton of *Trypanosoma brucei* by a library of monoclonal antibodies. *J Cell Sci*. **93 ( Pt 3)**, 491-500.

# Supplementary Figure S1

**A**

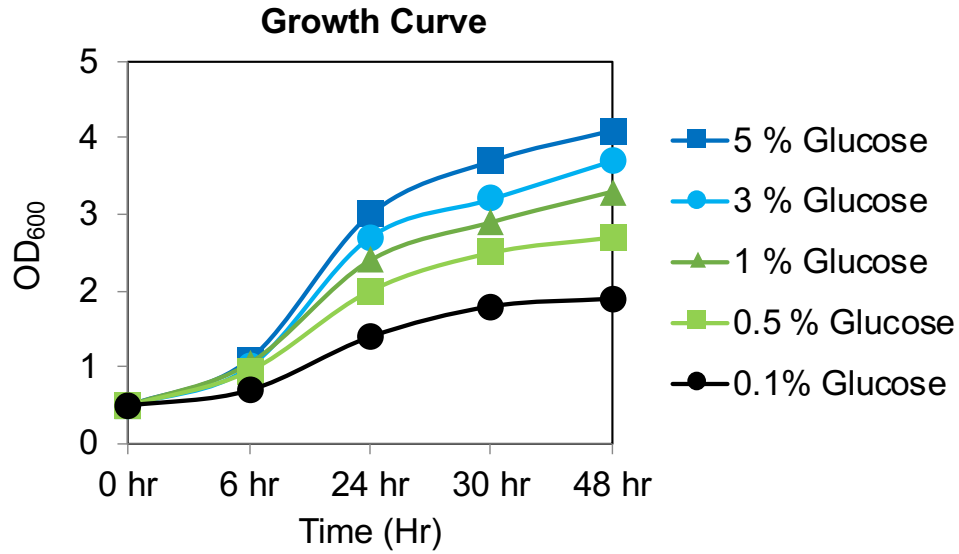

**B**

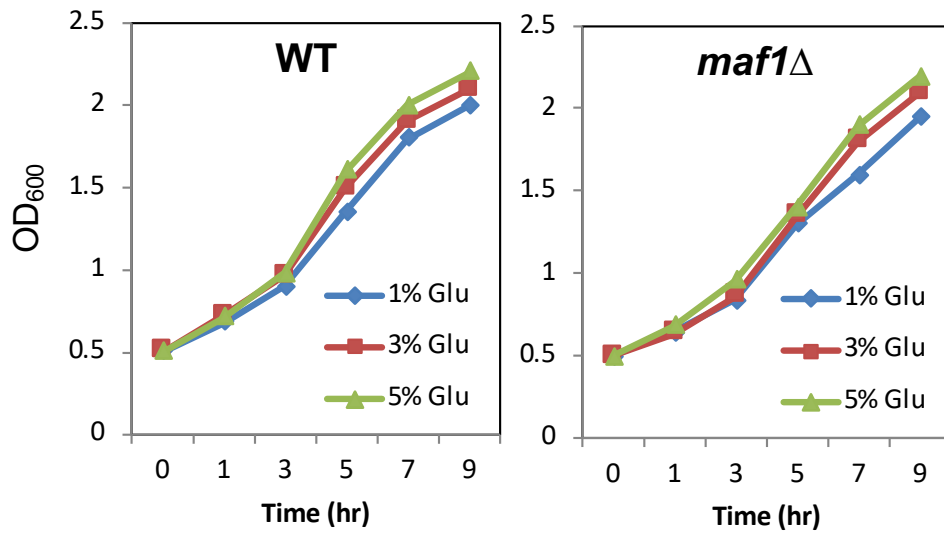

**C**

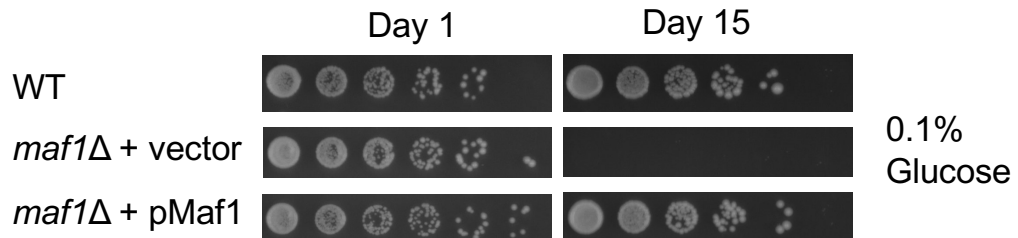



## Supplementary Figure S3

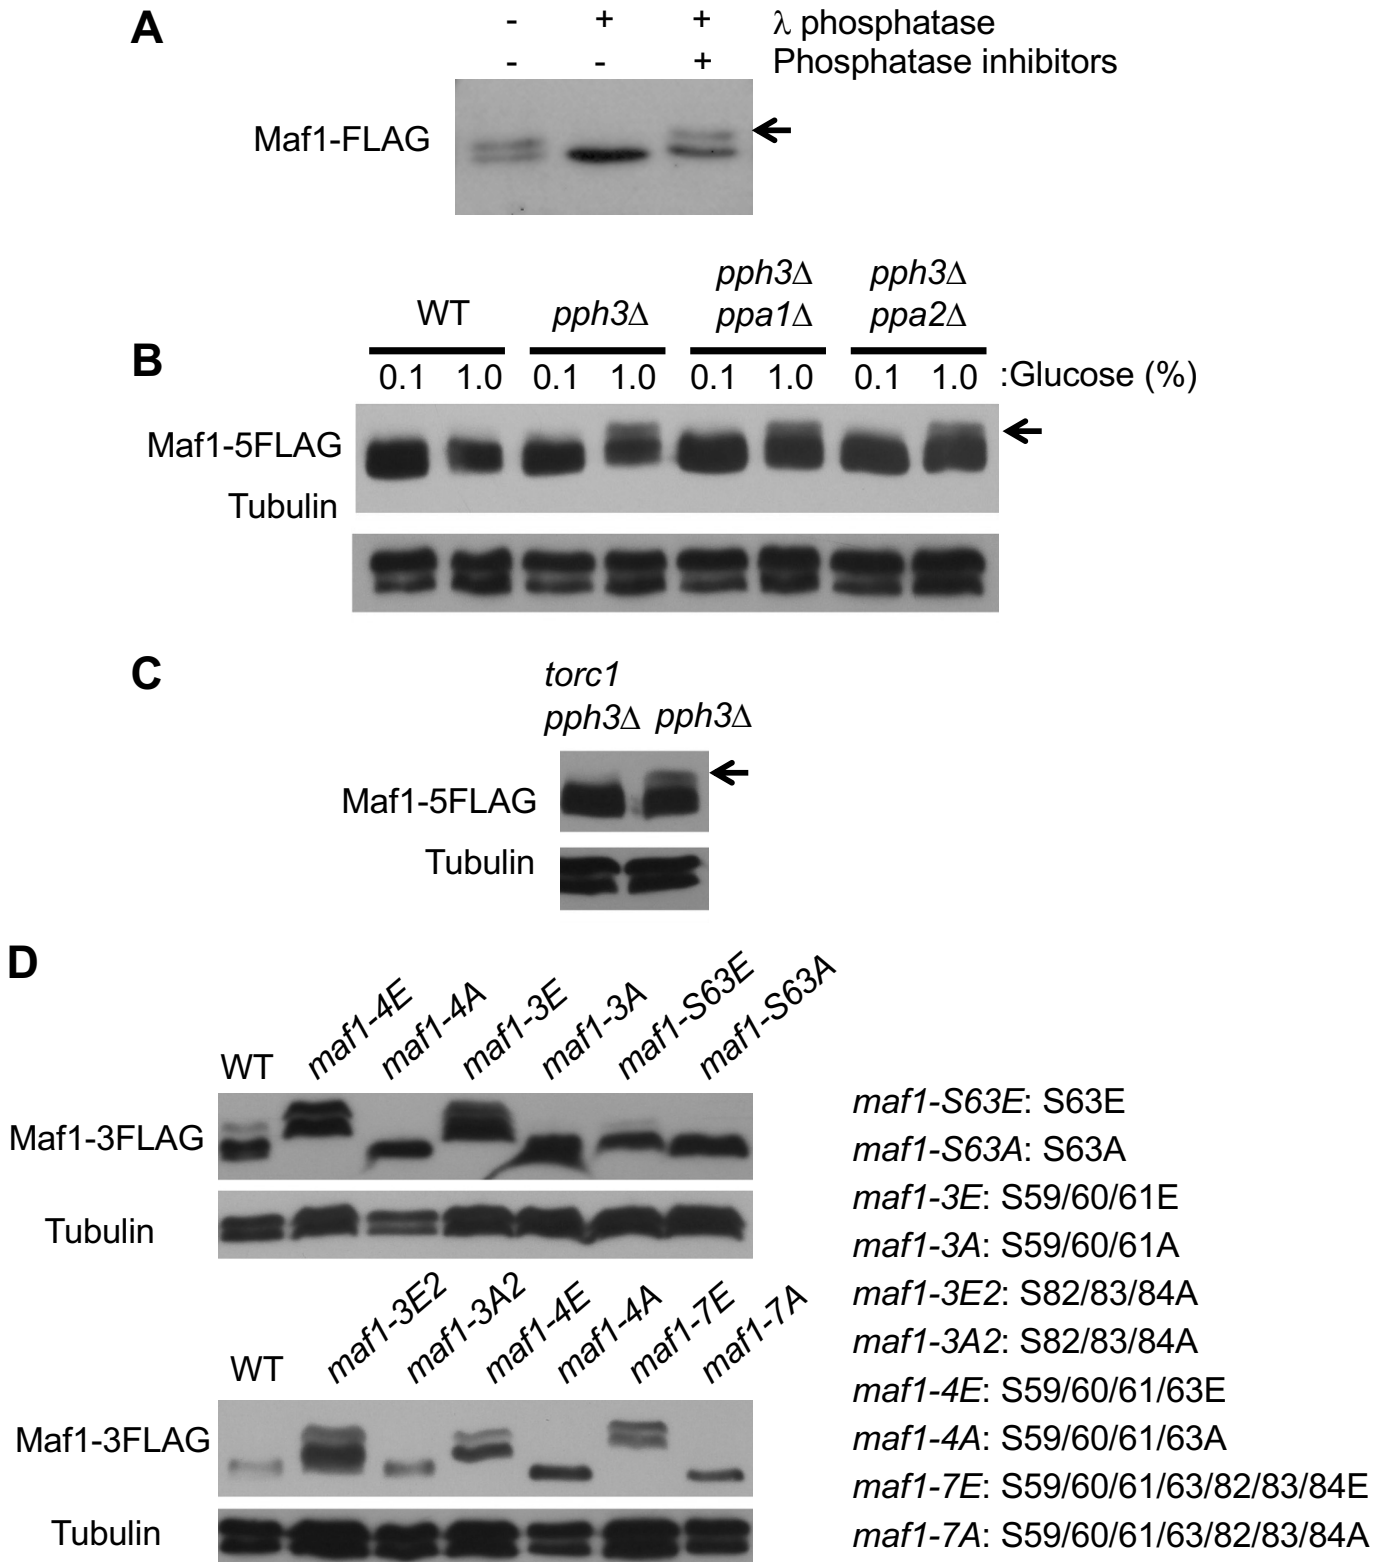



# Supplementary Figure S4

**A**

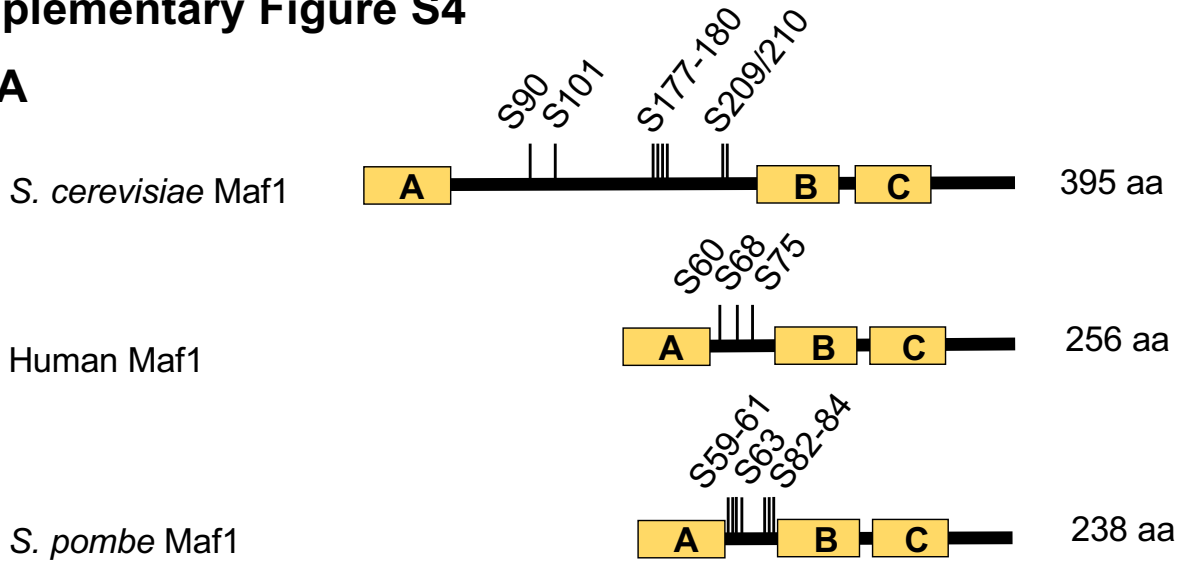

**B**

|                   |                                                               |     |
|-------------------|---------------------------------------------------------------|-----|
| <i>Cerevisiae</i> | MKFIDELDIERVNQTLNFTNDCKIVGSCDIPTTKAVASDRKLYKTIDQHLDTILQENEN   | 60  |
| <i>Pombe</i>      | MKFLELADLDTVNNALSFDAADDCRIRGKCELYTTKSTNSDKKLFKAIEN-----       | 49  |
| <i>Human</i>      | MKLLNSSFEAINSQLTVETGDAHIIGRIEYSYCKMAGDDKHMFKQFCQ-----E        | 50  |
|                   | **::: .:::*. *...:*. * * : : : * . *::: * : :                 |     |
| <i>Cerevisiae</i> | YNATLQQQLAAPETNOSPCSSPFYSNRSDSNFWEQRRISFSEYNSNNNTNNSNGNSSN    | 120 |
| <i>Pombe</i>      | ---RCQEDLFAISSKSI-----EY-----                                 | 66  |
| <i>Human</i>      | GQPHVLEALSPPQTSGLS-----                                       | 68  |
|                   | : * . . . .                                                   |     |
| <i>Cerevisiae</i> | NNNYSGPNGSSPATFPKSAKLNQNLKELVSNYDSGSMSSSLDSSSKNDERIRRRSSSS    | 180 |
| <i>Pombe</i>      | -----AFSLTQQS-----                                            | 74  |
| <i>Human</i>      | -----PSRLSKSQGGE-----                                         | 79  |
|                   | . * . . .                                                     |     |
| <i>Cerevisiae</i> | ISSFKSGKSSNNNYSSGTATNNVNKRRKSSINERPSNLSLGPFGPINEPSSRKIFAYLIA  | 240 |
| <i>Pombe</i>      | -----PFGPLDQSSSRRTFMIVIA                                      | 93  |
| <i>Human</i>      | -----EEGPLSDKCSRKTLFYLIA                                      | 98  |
|                   | **::: .**: : *::*                                             |     |
| <i>Cerevisiae</i> | ILNASY-PDHDfSSVEPTDFVKT-SLKTfISKfENTLYSLGR---QPEEWVWEVINSHM   | 294 |
| <i>Pombe</i>      | TLNASY-PDHDfSSLQPTDFYKEP SLSRVVDsvNSTLNNIGRG--RLSVNGIWEIIDRHI | 150 |
| <i>Human</i>      | TLNESFRPDYDFSTARSHFESREP SLWVvNAVNCsLFSAVREDFKDLKPQLWNAVDEEI  | 158 |
|                   | ** *: **:***: . : * : ** . . . : * . * : *::: . :             |     |
| <i>Cerevisiae</i> | TLSDCVLFQYSP-SNSFLEDEPGYLWNLIGFLYNRKRKRvAYLYLICSRlNSSTGEVEDA  | 353 |
| <i>Pombe</i>      | NLSDCSVYSYTPDSDSDPYGDDALIWGMSYFFFNKQMKRMLYLS-----LHGLGKEVSGR  | 205 |
| <i>Human</i>      | CLAECDIYSYNPDLSDPFGEDGSLWSFNyFFYNKRLKRIVFFS-----CRSISGStYTP   | 213 |
|                   | *::* :::*. * * * . : . : *::: *::*: . **::: . . . .           |     |
| <i>Cerevisiae</i> | LAKKPQGLIIDDGSNEYEGEYDFTYDENVIDDKSDQEEsLQ-                    | 395 |
| <i>Pombe</i>      | NRYGNDDDSVFTPLADDAE---P SDFDDDWVANMDD-----                    | 238 |
| <i>Human</i>      | SEAGNELDMELGEEVEEESRSRSGAEETStMEEDRVPVICI                     | 256 |
|                   | : . : : * : : *                                               |     |

# Supplementary Figure S5

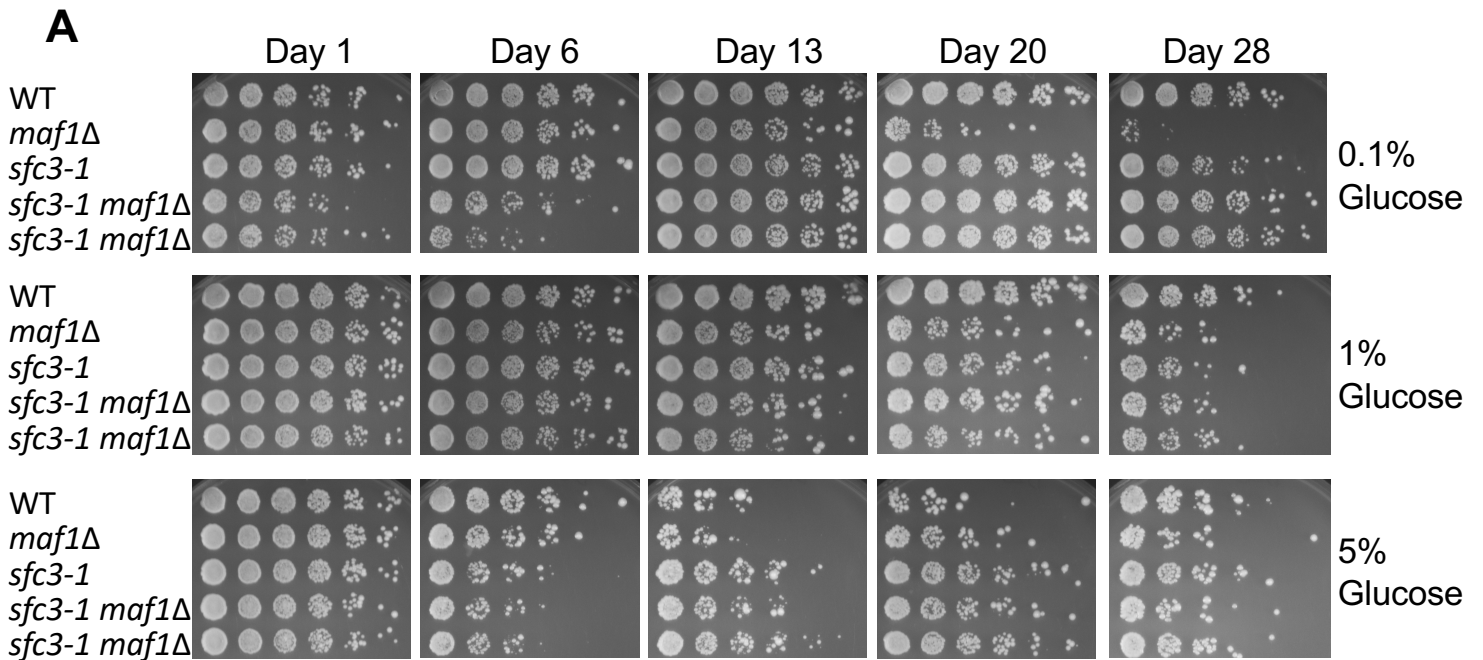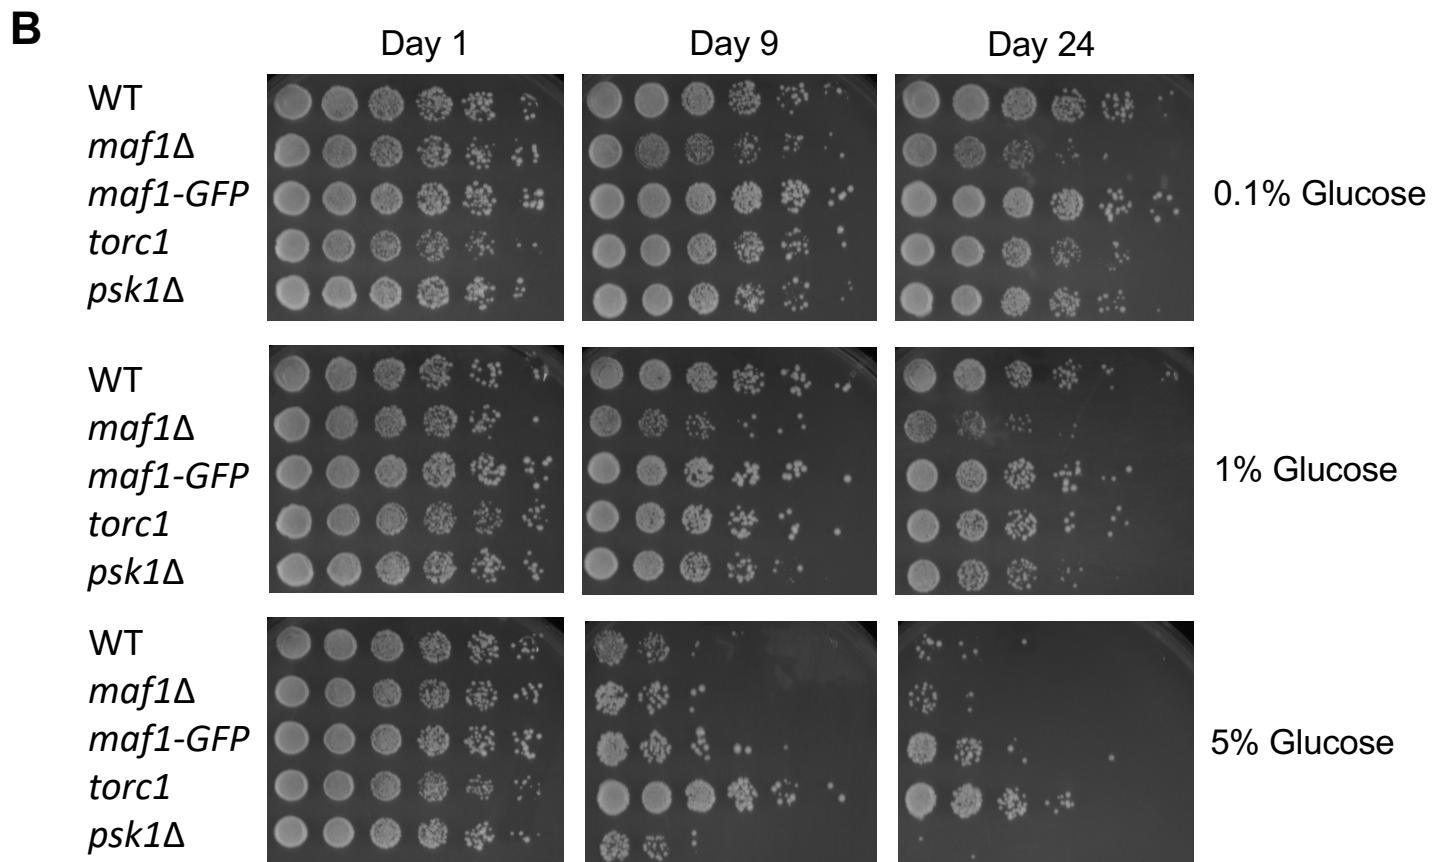

# Supplementary Figure S6

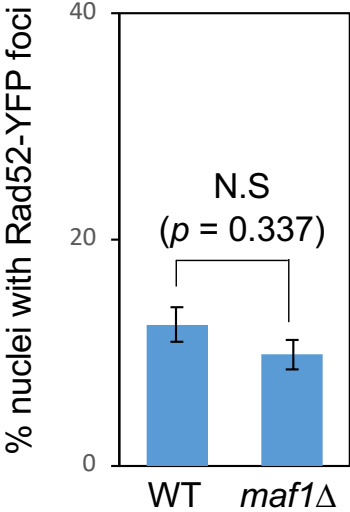

## Supplemental Table S1: *S. pombe* strains used in this study

| Figure | Strain | genotype                                                                          |
|--------|--------|-----------------------------------------------------------------------------------|
| 1A     | Y1     | h- leu1-32 ura4-D18                                                               |
| 1A     | Y3979  | h- maf1::hphMX6 leu1-32 ura4-D18                                                  |
| 1B     | Y4250  | h+ rad52-12PK:kanrMX6 leu1-32 ura4-D18                                            |
| 1B     | Y5159  | h+ maf1::hphMX6 rad52-12PK:kanMX6 leu1-32 ura4-D18                                |
| 1B     | Y5186  | h+ tor2ts[L2048S]KanR rad52-12PK:KanrMX6 leu1-32 ura4-D18                         |
| 1C, D  | Y1     | h- leu1-32 ura4-D18                                                               |
| 1C, D  | Y2     | h+ leu1-32 ura4-D18                                                               |
| 1C, D  | Y3979  | h- maf1::hphMX6 leu1-32 ura4-D18                                                  |
| 1C, D  | Y3980  | h+ maf1::hphMX6 leu1-32 ura4-D18                                                  |
| 2A     | Y4368  | h- maf1-FLAG:hphMX6 leu1-32 ura4-D18                                              |
| 2A     | Y4380  | h- maf1-FLAG:hphMX6 pph3::kanMX6 leu1-32 ura4-D18 his3-D1                         |
| 2B     | Y4871  | h- maf1-FLAG:hphMX6 leu1-32                                                       |
| 2B     | Y4949  | h- ppa1::ura4+ maf1-FLAG:hphMX6 leu1-32 ura4-D18                                  |
| 2B     | Y4955  | h- ppa2::ura4+ maf1-FLAG:hphMX6 leu1-32 ura4-D18                                  |
| 2C     | Y2     | h+ leu1-32 ura4-D18                                                               |
| 2C     | Y4782  | h+ tor2ts[L2048S]KanR leu1-32 ura4-D18                                            |
| 2C     | Y3980  | h+ maf1::hphMX6 leu1-32 ura4-D18                                                  |
| 2D     | Y2312  | h+ leu1-32                                                                        |
| 2D     | Y4870  | h+ pph3::kanMX6 leu1-32                                                           |
| 2D     | Y4905  | h- ppa1::ura4+ leu1 ura4                                                          |
| 2D     | Y4906  | h- ppa2::ura4+ leu1 ura4                                                          |
| 2D     | Y4951  | h+ ppa1::ura4+ pph3::hphMX6 leu1-32 ura4-D18                                      |
| 2D     | Y4952  | h- ppa1::ura4+ pph3::hphMX6 leu1-32 ura4-D18                                      |
| 2D     | Y4956  | h- ppa2::ura4+ pph3::hphMX6 leu1-32 ura4-D18                                      |
| 2D     | Y4957  | h- ppa2::ura4+ pph3::hphMX6 leu1-32 ura4-D18                                      |
| 3A     | Y4983  | h- maf1::hphMX6 leu1-32:leu1+ maf1-FLAG ura4-D18                                  |
| 3A     | Y5038  | h- maf1::hphMX6 leu1-32:leu1+ maf1-S59/60/61A-FLAG (maf1-3A) ura4-D18             |
| 3A     | Y5040  | h- maf1::hphMX6 leu1-32:leu1+ maf1-S63A-FLAG ura4-D18                             |
| 3A     | Y4987  | h- maf1::hphMX6 leu1-32:leu1+ maf1-S82/83/84A-FLAG (maf1-3A2) ura4-D18            |
| 3A     | Y4967  | h+ maf1::hphMX6 leu1-32:leu1+ maf1-S59/60/61/63A-FLAG (maf1-4A) ura4-D18          |
| 3A     | Y4965  | h- maf1::hphMX6 leu1-32:leu1+ maf1-S59/60/61/63/82/83/84A-FLAG (maf1-7A) ura4-D18 |
| 3B     | Y4983  | h- maf1::hphMX6 leu1-32:leu1+ maf1-FLAG ura4-D18                                  |
| 3B     | Y5042  | h- maf1::hphMX6 leu1-32:leu1+ maf1-S82/83/84E-FLAG (maf1-3E2) ura4-D18            |
| 3B     | Y4987  | h- maf1::hphMX6 leu1-32:leu1+ maf1-S82/83/84A-FLAG (maf1-3A2) ura4-D18            |
| 3B     | Y5044  | h- maf1::hphMX6 leu1-32:leu1+ maf1-S59/60/61/63E-FLAG (maf1-4E) ura4-D18          |
| 3B     | Y4967  | h+ maf1::hphMX6 leu1-32:leu1+ maf1-S59/60/61/63A-FLAG (maf1-4A) ura4-D18          |
| 3B     | Y5046  | h- maf1::hphMX6 leu1-32:leu1+ maf1-S59/60/61/63/82/83/84E-FLAG (maf1-7E) ura4-D18 |
| 3B     | Y4965  | h- maf1::hphMX6 leu1-32:leu1+ maf1-S59/60/61/63/82/83/84A-FLAG (maf1-7A) ura4-D18 |
| 3B     | Y5048  | h- maf1::hphMX6 leu1-32:leu1+ maf1-S59/60/61E-FLAG (maf1-3E) ura4-D18             |
| 3B     | Y5038  | h- maf1::hphMX6 leu1-32:leu1+ maf1-S59/60/61A-FLAG (maf1-3A) ura4-D18             |
| 3B     | Y5050  | h- maf1::hphMX6 leu1-32:leu1+ maf1-S63E-FLAG ura4-D18                             |
| 3B     | Y5040  | h- maf1::hphMX6 leu1-32:leu1+ maf1-S63A-FLAG ura4-D18                             |
| 3C     | Y4983  | h- maf1::hphMX6 leu1-32:leu1+ maf1-FLAG ura4-D18                                  |
| 3C     | Y4965  | h- maf1::hphMX6 leu1-32:leu1+ maf1-S59/60/61/63/82/83/84A-FLAG (maf1-7A) ura4-D18 |
| 3C     | Y5046  | h- maf1::hphMX6 leu1-32:leu1+ maf1-S59/60/61/63/82/83/84E-FLAG (maf1-7E) ura4-D18 |
| 3D     | Y1     | h- leu1-32 ura4-D18                                                               |
| 3D     | Y3979  | h- maf1::hphMX6 leu1-32 ura4-D18                                                  |
| 3D     | Y4570  | h- pph3::hphMX6 leu1-32 ura4-D18                                                  |
| 3D     | Y4783  | h- tor2ts[L2048S]KanR leu1-32 ura4-D18                                            |
| 3E     | Y2311  | h- leu1-32                                                                        |
| 3E     | Y4777  | h- maf1::hphMX6 leu1-32                                                           |
| 3E     | Y4905  | h- ppa1::ura4+ leu1 ura4                                                          |
| 3E     | Y4906  | h- ppa2::ura4+ leu1 ura4                                                          |
| 4A     | Y2     | h+ leu1-32 ura4-D18                                                               |
| 4A     | Y3980  | h+ maf1::hphMX6 leu1-32 ura4-D18                                                  |
| 4A     | Y4782  | h+ tor2ts[L2048S]KanR leu1-32 ura4-D18                                            |
| 4A     | Y5052  | h+ tor2ts[L2048S]KanR maf1::hphMX6 leu1-32 ura4-D18                               |
| 4A     | Y5062  | h+ psk1::kanMX6 leu1-32 ura4-D18                                                  |

|        |       |                                                                          |
|--------|-------|--------------------------------------------------------------------------|
| 4B     | Y1    | h- leu1-32 ura4-D18                                                      |
| 4B     | Y2    | h+ leu1-32 ura4-D18                                                      |
| 4B     | Y3979 | h- maf1::hphMX6 leu1-32 ura4-D18                                         |
| 4B     | Y3980 | h+ maf1::hphMX6 leu1-32 ura4-D18                                         |
| 4B     | Y4782 | h+ tor2ts[L2048S]KanR leu1-32 ura4-D18                                   |
| 4B     | Y4783 | h- tor2ts[L2048S]KanR leu1-32 ura4-D18                                   |
| 4B     | Y5051 | h- tor2ts[L2048S]KanR maf1::hphMX6 leu1-32 ura4-D18                      |
| 4B     | Y5052 | h+ tor2ts[L2048S]KanR maf1::hphMX6 leu1-32 ura4-D18                      |
| 4C     | Y1    | h- leu1-32 ura4-D18                                                      |
| 4C     | Y3979 | h- maf1::hphMX6 leu1-32 ura4-D18                                         |
| 5A     | Y5126 | h+ leu1-32 rad52-YFP:leu+                                                |
| 5A     | Y5188 | h+ maf1::hphMX6 rad52-YFP:leu+ leu1-32 ura4-D18                          |
| 5A     | Y5115 | h+ pph3::kanMX6 leu1-32 rad52-YFP:leu+                                   |
| 5A     | Y5190 | h+ pph3::kanMX6 maf1::hphMX6 rad52-YFP:leu+ leu1-32 ura4-D18             |
| 5B     | Y5126 | h+ leu1-32 rad52-YFP:leu+                                                |
| 5B     | Y5124 | h- ppa1::ura4+ rad52-YFP:leu+ leu1-32 ura4-D18                           |
| 5B     | Y5123 | h- ppa2::ura4+ rad52-YFP:leu+ leu1-32 ura4-D18                           |
| 5B     | Y5115 | h+ pph3::kanMX6 rad52-YFP:leu+ leu1-32                                   |
| 5B     | Y5117 | h+ ppa1::ura4+ pph3::hphMX6 rad52-YFP:leu+ leu1-32 ura4-D18              |
| 5B     | Y5119 | h- ppa2::ura4+ pph3::hphMX6 rad52-YFP:leu+ leu1-32 ura4-D18              |
| 5C     | Y4627 | h+ rad52-YFP:ura4+ leu1-32 ura4-D18                                      |
| 5C     | Y4006 | h+ maf1::hphMX6 rad52-YFP:ura4+ leu1-32 ura4-D18                         |
| 5D     | Y2    | h+ leu1-32 ura4-D18                                                      |
| 5D     | Y4782 | h+ tor2ts[L2048S]KanR leu1-32 ura4-D18                                   |
| 5D     | Y3980 | h+ maf1::hphMX6 leu1-32 ura4-D18                                         |
| 5D     | Y4708 | h+ rad52::hphMX6 leu1-32 ura4-D18                                        |
| 5D     | Y4862 | h+ maf1::kanMX6 rad52::hphMX6 leu1-32 ura4-D18                           |
| 5E     | Y2    | h+ leu1-32 ura4-D18                                                      |
| 5E     | Y3979 | h- maf1::hphMX6 leu1-32 ura4-D18                                         |
| 5E     | Y3980 | h+ maf1::hphMX6 leu1-32 ura4-D18                                         |
| 5E     | Y5470 | h- pph3::hphMX6 leu1-32 ura4-D18                                         |
| 5E     | Y4571 | h+ pph3::hphMX6 leu1-32 ura4-D18                                         |
| 5E     | Y4435 | h+ maf1::KanMX6 pph3::hphMX6 leu1-32 ura4-D18                            |
| 5E     | Y4436 | h- maf1::KanMX6 pph3::hphMX6 leu1-32 ura4-D18                            |
| 6A, B  | Y4250 | h+ rad52-12PK:kanrMX6 leu1-32 ura4-D18                                   |
| 6A, B  | Y5159 | h+ maf1::hphMX6 rad52-12PK:kanMX6 leu1-32 ura4-D18                       |
| S1A    | Y1    | h- leu1-32 ura4-D18                                                      |
| S1B, C | Y1    | h- leu1-32 ura4-D18                                                      |
| S1B, C | Y3979 | h- maf1::hphMX6 leu1-32 ura4-D18                                         |
| S2     | Y1    | h- leu1-32 ura4-D18                                                      |
| S2     | Y2    | h+ leu1-32 ura4-D18                                                      |
| S2     | Y3979 | h- maf1::hphMX6 leu1-32 ura4-D18                                         |
| S2     | Y3980 | h+ maf1::hphMX6 leu1-32 ura4-D18                                         |
| S2     | Y4782 | h+ tor2ts[L2048S]KanR leu1-32 ura4-D18                                   |
| S2     | Y4783 | h- tor2ts[L2048S]KanR leu1-32 ura4-D18                                   |
| S2     | Y5051 | h- tor2ts[L2048S]KanR maf1::hphMX6 leu1-32 ura4-D18                      |
| S2     | Y5052 | h+ tor2ts[L2048S]KanR maf1::hphMX6 leu1-32 ura4-D18                      |
| S3A    | Y4368 | h- maf1-FLAG:hphMX6 leu1-32 ura4-D18                                     |
| S3B    | Y4871 | h- maf1-FLAG:hphMX6 leu1-32                                              |
| S3B    | Y4380 | h- maf1-FLAG:hphMX6 pph3::kanMX6 leu1-32 ura4-D18 his3-D1                |
| S3B    | Y4947 | h- ppa1::ura4+ maf1-FLAG:hphMX6 pph3::hphMX6 leu1-32 ura4-D18            |
| S3B    | Y4953 | h- ppa2::ura4+ maf1-FLAG:hphMX6 pph3::hphMX6 leu1-32 ura4-D18            |
| S3C    | Y4944 | h+ maf1-FLAG:hphMX6 tor2ts[L2048S]KanR pph3::hphMX6 leu1-32 ura4-D18     |
| S3C    | Y4380 | h- maf1-FLAG:hphMX6 pph3::kanMX6 leu1-32 ura4-D18 his3-D1                |
| S3D    | Y4983 | h- maf1::hphMX6 leu1-32:leu1+ maf1-FLAG ura4-D18                         |
| S3D    | Y5044 | h- maf1::hphMX6 leu1-32:leu1+ maf1-S59/60/61/63E-FLAG (maf1-4E) ura4-D18 |
| S3D    | Y4967 | h+ maf1::hphMX6 leu1-32:leu1+ maf1-S59/60/61/63A-FLAG (maf1-4A) ura4-D18 |
| S3D    | Y5048 | h- maf1::hphMX6 leu1-32:leu1+ maf1-S59/60/61E-FLAG (maf1-3E) ura4-D18    |
| S3D    | Y5038 | h- maf1::hphMX6 leu1-32:leu1+ maf1-S59/60/61A-FLAG (maf1-3A) ura4-D18    |
| S3D    | Y5050 | h- maf1::hphMX6 leu1-32:leu1+ maf1-S63E-FLAG ura4-D18                    |
| S3D    | Y5040 | h- maf1::hphMX6 leu1-32:leu1+ maf1-S63A-FLAG ura4-D18                    |
| S3D    | Y5042 | h- maf1::hphMX6 leu1-32:leu1+ maf1-S82/83/84E-FLAG (maf1-3E2) ura4-D18   |

|     |       |    |                                                                                |
|-----|-------|----|--------------------------------------------------------------------------------|
| S3D | Y4987 | h- | maf1::hphMX6 leu1-32:leu1+ maf1-S82/83/84A-FLAG (maf1-3A2) ura4-D18            |
| S3D | Y5046 | h- | maf1::hphMX6 leu1-32:leu1+ maf1-S59/60/61/63/82/83/84E-FLAG (maf1-7E) ura4-D18 |
| S3D | Y4965 | h- | maf1::hphMX6 leu1-32:leu1+ maf1-S59/60/61/63/82/83/84A-FLAG (maf1-7A) ura4-D18 |
| S5A | Y2    | h+ | leu1-32 ura4-D18                                                               |
| S5A | Y3980 | h+ | maf1::hphMX6 leu1-32 ura4-D18                                                  |
| S5A | Y5218 | h+ | sfc3-1-12PK:kanMX6                                                             |
| S5A | Y5219 | h+ | sfc3-1-12PK:kanMX6 maf1::hhpMX6                                                |
| S5A | Y5221 | h+ | sfc3-1-12PK:kanMX6 maf1::hhpMX6                                                |
| S5B | Y2    | h+ | leu1-32 ura4-D18                                                               |
| S5B | Y3980 | h+ | maf1::hphMX6 leu1-32 ura4-D18                                                  |
| S5B | Y4208 | h+ | maf1-GFP:hphMX6 leu1-32 ura4-D18                                               |
| S5B | Y4782 | h+ | tor2ts[L2048S]KanR leu1-32 ura4-D18                                            |
| S5B | Y5062 | h+ | psk1::kanMX6 leu1-32 ura4-D18                                                  |
| S6  | Y4627 | h+ | rad52-YFP:ura4+ leu1-32 ura4-D18                                               |
| S6  | Y4006 | h+ | maf1::hphMX6 rad52-YFP:ura4+ leu1-32 ura4-D18                                  |

## Supplemental Table S2: Oligonucleotide primers used in this study

| Figure | Name            | Sequence                      |
|--------|-----------------|-------------------------------|
| 1A     | tRNA(Ser+Met).f | TGT CCG AGT GGT TAA GGA GTT   |
| 1A     | tRNA(Ser+Met).r | TGG GAC CTA CGG GTT ATG AG    |
| 1B     | tRNA(Lys1).f    | GGC TCA ATC GGT TTA GAG CG    |
| 1B     | tRNA(Lys1).r    | CTC GCA ACC TTC TGA TTA CCA T |
| 1B     | tRNA (Leu06).f  | CAG TTG GCC GAG CGG TCT ATG   |
| 1B     | tRNA (Leu06).r  | TGA CCA GTG AGG GAT TCG AAC   |
| 3C,D,E | tRNA(Ser+Met).f | TGT CCG AGT GGT TAA GGA GTT   |
| 3C,D,E | tRNA(Ser+Met).r | TGG GAC CTA CGG GTT ATG AG    |
| 3C,D,E | tRNA (Leu06).f  | CAG TTG GCC GAG CGG TCT ATG   |
| 3C,D,E | tRNA (Leu06).r  | TGA CCA GTG AGG GAT TCG AAC   |
| 3C,D,E | tRNA (arg05).f  | ACG CGT GGC GCA ATG GTA GC    |
| 3C,D,E | tRNA (arg05).r  | CTT ACA CGA CGG GAC TCG AAC   |
| 6      | tRNA (Leu05).f  | GCT ATG CCC GAG TGG TCT AAG   |
| 6      | tRNA (Leu05).r  | TGC GGC CAG AGA GGT TCG AAC   |
| 6      | tRNA (Leu06).f  | CAG TTG GCC GAG CGG TCT ATG   |
| 6      | tRNA (Leu06).r  | TGA CCA GTG AGG GAT TCG AAC   |
| 6      | tRNA (arg05).f  | ACG CGT GGC GCA ATG GTA GC    |
| 6      | tRNA (arg05).r  | CTT ACA CGA CGG GAC TCG AAC   |
